## Repeated games for eco-friendly flushing in reservoirs

Hamid Khakzad

Department of Engineering, RusPers Group Company, 109263, Moscow, Russia. E-mail: khakzad.hamid@yahoo.com

---

### Abstract

Repeated games, an important mathematical formalism, open attractive perspectives in the modeling and studying of interactions between multiple self-interested parties (individuals or groups). The main conceptual difference between static, and repeated and dynamic games is that the former have a preset, finite number of turns, while the latter can potentially last forever and end only with a decision by a player, or by chance. Unlike previous surveys of repeated games, which originated mainly from the economics research community, the performances of repeated games were investigated in this study for evaluating the time required to flush a reservoir, taking account of water quantity and quality. A sediment-flushing model was developed to estimate the flushed sediment and water volumes, and operating period of flushing, to be taken into account in the reservoir simulation model. Dez Hydropower Reservoir in Iran was chosen as the case study for applying the proposed methodology. The results show that the methodology provides an effective and useful tool for reservoir operation.

**Key words:** ecological flow, nash equilibrium, repeated games, sediment management

---

### INTRODUCTION

Sedimentation in reservoirs causes loss of capacity, increased flood risk, degradation of water quality, and increased difficulty in reservoir operation and maintenance, with consequent increases in their costs. Sediment storage can also have a significant impact on downstream ecosystems in large river basins. Given the scarcity of undeveloped dam sites in watersheds that are already extensively exploited, it will be necessary in future to focus increasingly on storage preservation. The effects of reservoir sedimentation can be mitigated by implementing suitable management techniques (Nikolaos *et al.* 2017).

Flushing is one of the most economical methods for recovering lost storage without incurring the costs of dredging. It involves remobilizing deposited sediments by increasing the flow velocity in the reservoir. The entrained deposits are discharged downstream through low-level outlets. The flow velocity is increased by drawing down the reservoir water level through a suitably designed outlet. Flushing also releases large volumes of sediment downstream, however, creating potentially serious problems. Scouring of polluted sediments from the reservoir threatens downstream water quality and ecology (Sloff 1991), while the high sediment concentrations released may have a significant impact on downstream biota (Morris & Fan 1997). This has led to the development of an 'environmentally friendly flushing' technique (Fruchart 2008).

In this method the hypolimnetic water from the bottom outlet, which has a high suspended sediment load, is mixed with water from the mid-depth outlet, which is low in suspended sediment. Thus, the flushing flow created has much lower suspended sediment concentrations than would otherwise be the case. The technique also improves downstream oxygen concentration, and minimizes temperature changes and pollution: water from near the bottom of a stratified reservoir is usually cold, oxygen-depleted, and high in hydrogen sulphide and other pollutants, whereas water from the mid-depths

is more oxygenated and warmer, and contains lower concentrations of heavy metals and pollutants (McCartney *et al.* 2001).

Since about 2,000, many researchers, including those working in environmental resources management, have implemented a range of game theory tools and concepts. Carraro *et al.* (2005), Parrachino *et al.* (2006), and Zara *et al.* (2006) review game theory water conflict resolution studies. Some hydrological issues like water resources allocation (Wang *et al.* 2003; Kucukmehmetoglu 2012), watershed eco-compensation (Cao *et al.* 2011), bi-objective optimization of reservoir watershed management (Üçler *et al.* 2015) and water pollution control (Shi *et al.* 2016) have also been resolved by applying game theory. Nevertheless, the full extent of game theory has not been used in systems analysis in water and soil resource management, particularly at watershed scale (Adhami & Sadeghi 2016). Predicted stable game outcomes are not necessarily Pareto-optimal. The main concern of players is to maximize their own benefit, knowing that the final outcome is the product of all decisions made (Madani 2010). Game theory provides more realistic simulation of stakeholders' interest-based behavior. The self-optimizing attitude of players and stakeholders, represented in game theory, often results in non-cooperative stakeholder behaviors even when cooperative behavior is more beneficial to all parties. Game theory can help provide some planning, policy, and design insights that would not be available from other traditional systems engineering methods.

Another advantage of game theory over traditional quantitative simulation and optimization methods is its ability to simulate different aspects of the conflict, incorporate various characteristics of the problem, and predict possible resolutions in the absence of quantitative payoff information. Often non-cooperative game theory methods can help resolve conflicts based on qualitative knowledge about players' payoffs (i.e. how the players order (rank) different outcomes (ordinal payoffs)). This enables it to handle the socio-economic aspects of conflicts and planning, design, and policy problems when quantitative information is not readily available.

This study presents the principles of repeated and dynamic games, one of the game theory methods that has shown great potential for conflict problem solution. After developing the necessary elements, an adaptation of this algorithm is provided for conflict resolution for eco-friendly flushing in reservoirs. The results of applying the methodology are shown in a case study.

## MATERIALS AND METHODS

### Study area and data collection

The study was carried out at Dez Reservoir, in southern Iran, a large hydroelectric dam built in 1963 by an Italian consortium. At the time it was Iran's largest development project. The dam is a 203 m high, double curvature, arch dam. Its crest is 352 m above sea level. The original reservoir volume was  $3,315 \times 10^6 \text{ m}^3$ , and the estimated volume of sediment arriving over 50 years was  $840 \times 10^6 \text{ m}^3$ . The reservoir's minimum and maximum operating water levels are 300 and 352 m above sea level, respectively.

The Dez project is now more than 40 years old and reaching mid-life. Its useful life is threatened by a sediment delta, which is approaching the dam's intake tunnels. A hydrographic study in 2002 showed that sedimentation had reduced the reservoir's useful storage from  $3,315.6$  to  $2,700 \times 10^6 \text{ m}^3$  (19%). The difference between the turbine inlet and bed surface levels of the sedimentary deposit is 14 m, and the sedimentation rate near the turbine inlet is 2 m/year, so sediment management in the reservoir is of considerable importance (Khakzad & Elfimov 2014a).

A field measurement program for the turbidity currents in the reservoir ran from December 2002 to June 2003 (Dezab Consulting Engineers 2004). The program consisted of a series of daily measurements at various depths and locations along seven cross-sections. The measurement station locations are shown in Figure 1. Valeport 108 MK II (Valeport Ltd, Devon, UK), for the first four

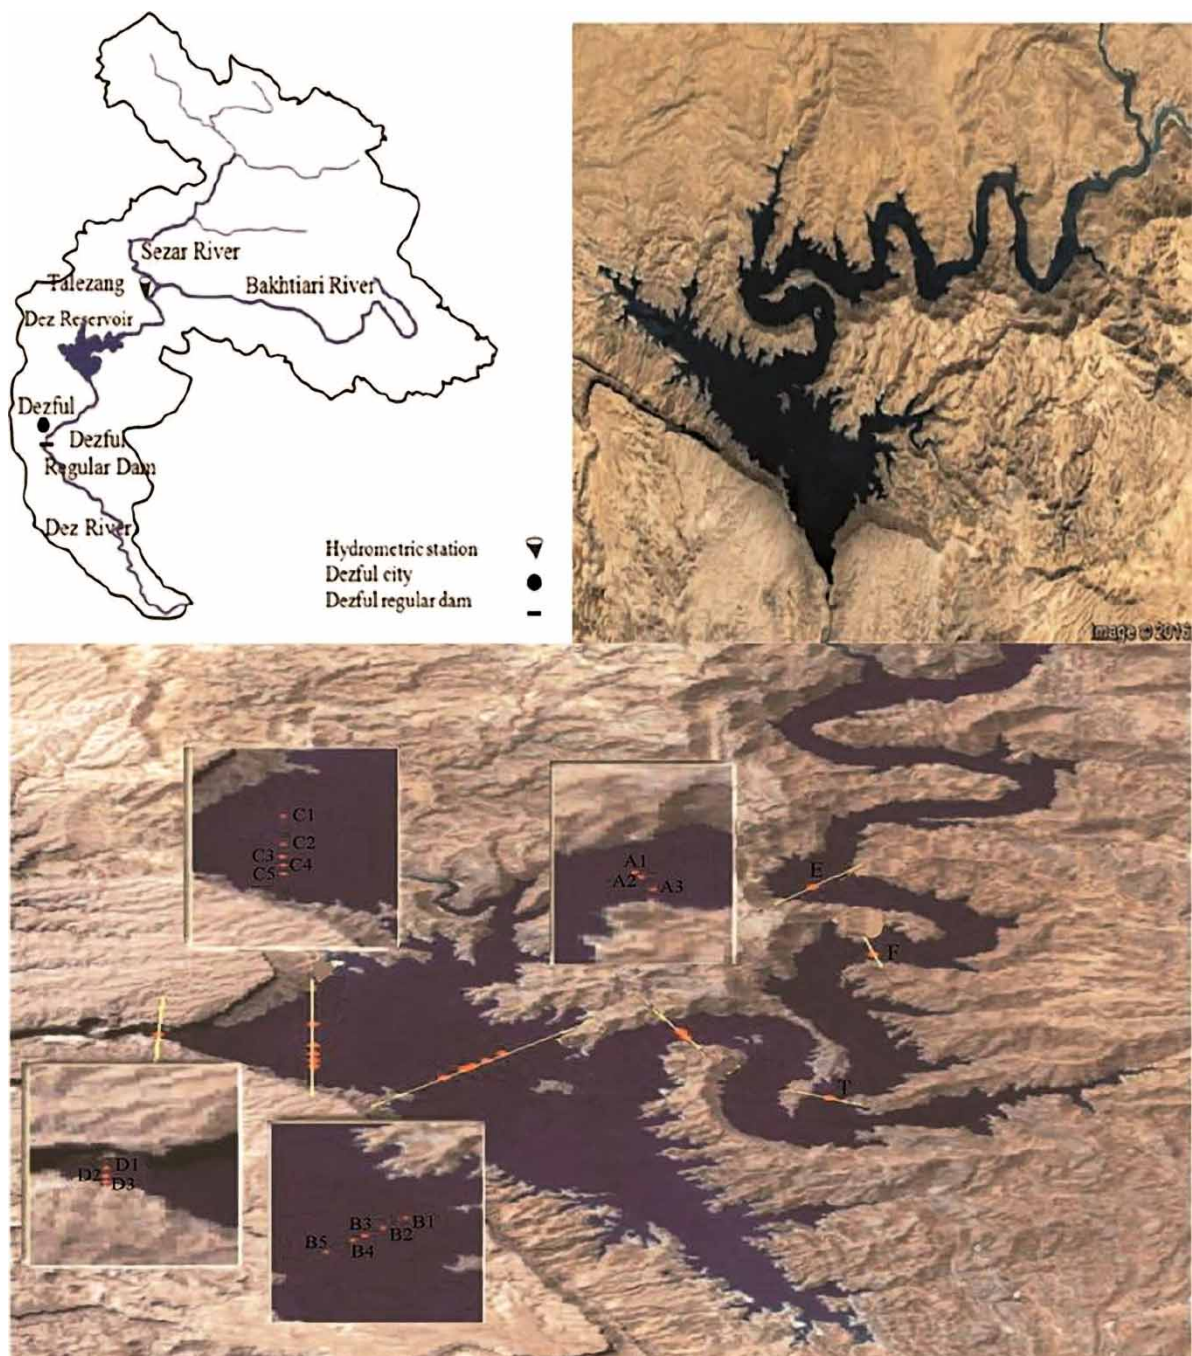

**Figure 1** | The plan view of Dez watershed and measurement station locations on Dez Reservoir.

months, and, subsequently, RCM9 instruments (Aanderaa Data Instruments, Bergen, Norway) were used to measure the current velocity and direction, electrical conductivity, temperature, and pressure.

The Valeport 108 MK II was developed to meet the needs of oceanographers, hydrographers and surveyors. Speed and direction sensors are fitted as standard, with optional conductivity, temperature and depth sensors. The RCM9, used from the fourth month, can also measure turbidity and is self-recording. Figures 2–5 show measurement record samples on turbidity currents at stations A2, B3, C3, E, and F, collected on April 24, 2003. The water level then was 351 m, maximum depth 94 m, and the reservoir inflow and outflow 1,210.6 and 590.8 m<sup>3</sup>/s, respectively (KWEO 2003).

The data collected from December 2002 to April 2003 showed that there were only two significant turbidity currents. The velocity and suspended sediment concentrations measured at section A

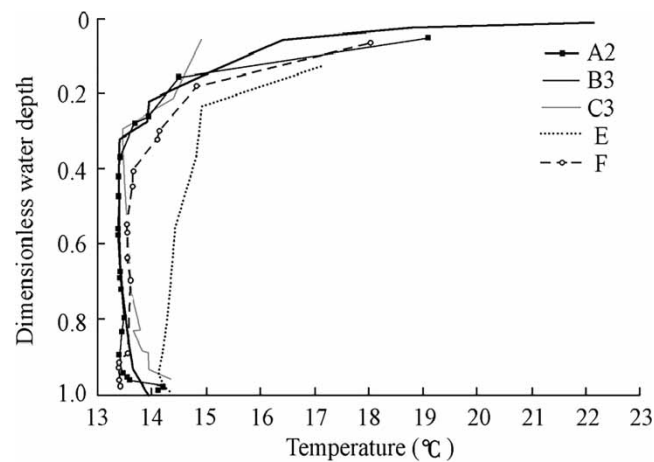

**Figure 2** | Temperature-dimensionless water depth profiles at different stations.

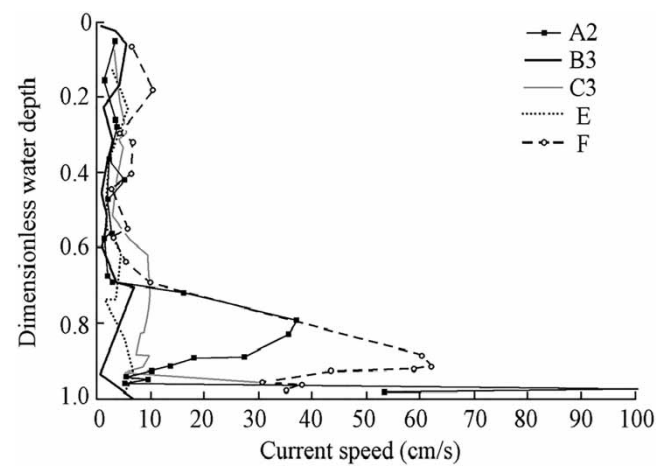

**Figure 3** | Current speed-dimensionless water depth profiles at different stations.

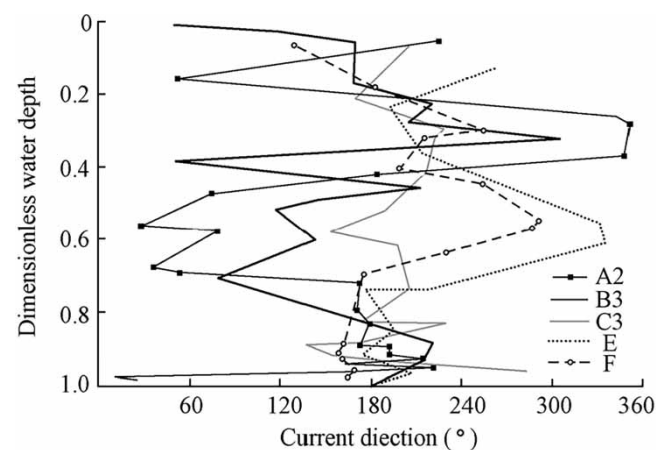

**Figure 4** | Current direction-dimensionless water depth profiles at different stations.

indicated that the first turbidity current occurred on January 28 and 29, 2003. The turbid layer was about 15 m thick, the near-surface water flow direction was upstream, and the velocity was low. As would be expected, large slow-moving eddies were present above the turbidity current, whose velocity

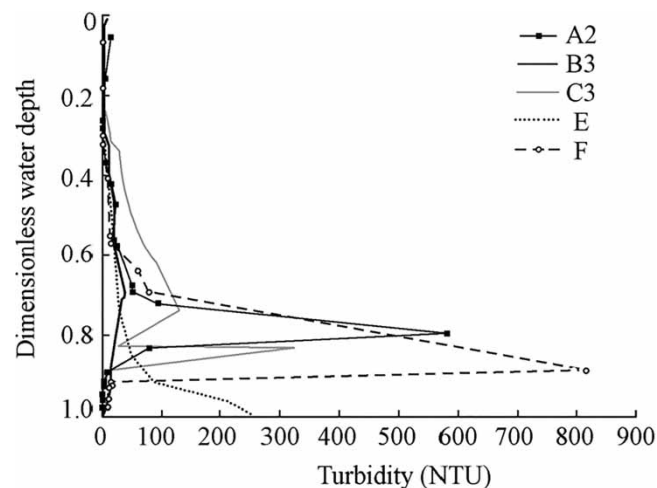

**Figure 5** | Turbidity-dimensionless water depth profiles at different stations.

and direction changed with time. Some 44,000 m<sup>3</sup> of fine sediment moved into the reservoir on January 29, 2003.

The second turbidity current occurred on April 23 and 24, 2003. It is difficult to quantify the turbidity load using the measurements available. However, on the basis of the average reservoir inflow values, the total volume of sediment for the rainstorm events rose to around 1.2 Mm<sup>3</sup> over the two days. Table 1 shows the range and values of the different parameters used in this study. The median particle size of all samples was less than 0.01 mm, with that of the sediments collected upstream in the reservoir slightly larger than those closer to the dam.

**Table 1** | Turbidity current parameters in Dez Reservoir from December 2002 to June 2003

| Date          | Station | Water depth (m) | Observed deposit depth (m) | Turbidity current width (m) | Mean velocity (m/s) | Turbidity current direction (°) | Sediment transport rate (m <sup>3</sup> /d) |
|---------------|---------|-----------------|----------------------------|-----------------------------|---------------------|---------------------------------|---------------------------------------------|
| Jan. 29, 2003 | A2      | 58              | 15                         | 300                         | 0.17                | 163 to 231                      | 44,000                                      |
| Apr. 23, 2003 | A2      | 94              | 20                         | 300                         | 0.8                 | 180                             | 1,014,000                                   |
| Apr. 23, 2003 | F       | 77              | 23.5                       | 200                         | 0.75                | 180                             | 622,000                                     |
| Apr. 24, 2003 | A2      | 94              | 10                         | 300                         | 0.3                 | 180                             | 525,000                                     |
| Apr. 24, 2003 | B3      | 92              | 12                         | 700                         | 0.1                 | 90                              | 145,000                                     |
| Apr. 24, 2003 | C3      | 94              | 18.5                       | 1,000                       | 0.08                | 180                             | 525,000                                     |

### Repeated and dynamic games

Dynamic games – e.g., repeated, Markov chain and stochastic games – extend stage-games (Figure 6). A repeated game is a dynamic game in which the same stage-game is played in periods (or stages)  $t = 0, 1, 2$ , etc. When the number of game periods is not known in advance and can be infinite, the repeated game is called infinite (Burkov & Chaib-draa 2015). The simplest case occurs when, at  $t = 0, 1, 2$ , etc, a game is played (whether identical or not), and the strategy selections and payoffs at time  $t$  are independent of those in the previous time periods. In other words, games played at different time periods are completely independent. The payoff of this repeated game for each player is the (possibly discounted) sum of payoffs at the different time periods (Matsumoto & Szidarovszky 2016).

Repeating a game raises two further issues about the players: 1. How do they remember the past? 2. How do they appraise the future? The set of the repeated game histories up to period  $t$  is given by  $H^t \equiv \times_t A$ . The set of all possible histories is given by  $H \equiv \cup_{t=0}^{\infty} H^t$ . Player  $i$ 's (mixed) strategy is a

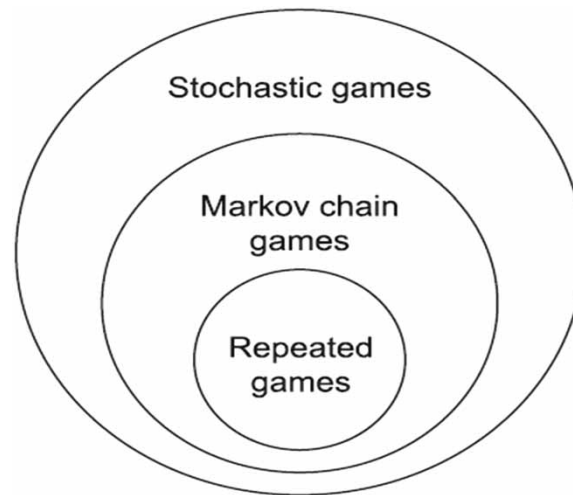

**Figure 6** | Dynamic game models (Burkov & Chaib-draa 2015).

mapping of  $\sigma_i: H \rightarrow \Delta(A_i)$ . A strategy profile is a vector  $\sigma \equiv (\sigma_i)_{i \in N}$ .  $\Sigma_i$  denotes player  $i$ 's strategy set, and  $\Sigma \equiv \times_{i \in N} \Sigma_i$  the set of strategy profiles.

A *subgame* is a dynamic game that continues after a certain history. For a pair  $(\sigma, h)$ , the *subgame strategy profile* induced by  $h$  is denoted as  $\sigma|_h$ .

An outcome path in the repeated game is a possibly infinite stream  $\vec{a} \equiv (a^0, a^1, \dots)$  of action profiles. Let  $\sigma$  be a strategy profile, the discounted average *payoff* of  $\sigma$  for player  $i$  is defined as in Equation (1):

$$u_i(\sigma) \equiv (1 - \gamma) \sum_{t=0}^{\infty} \gamma^t r_i(a^t), \quad (1)$$

where  $\gamma \equiv [0, 1)$  is the discount factor. The payoff profile induced by  $\sigma$  as  $u(\sigma) \equiv (u_i(\sigma))_{i \in N}$ .

The strategy profile  $\sigma$  is a (Nash) equilibrium if, for each player  $i$  and its strategies,  $\sigma'_i \in \Sigma_i$ :

$$u_i(\sigma) \geq u_i(\sigma'_i, \sigma_{-i}), \quad (2)$$

where  $\sigma \equiv (\sigma_i, \sigma_{-i})$

A strategy profile  $\sigma$  is a subgame-perfect Nash equilibrium (SPNE) in the repeated game if, for all histories,  $h \in H$ , the subgame strategy profile  $\sigma|_h$  is a Nash equilibrium in the subgame.

Finally, a pair of strategies  $(\sigma_1, \sigma_2)$  satisfies the one-stage deviation condition if neither player can increase their payoff by deviating (unilaterally) from such strategy in any single stage and returning to the specified strategy thereafter. In these conditions: a pair of strategies is an SPNE (a strategy profile that induces an NE in every subgame) for a discounted game if and only if it satisfies the one-stage deviation condition.

Finally, it is noted that there are a cluster of results, commonly known as folk theorems, characterizing the set of payoff profiles of Nash and subgame-perfect equilibria in a repeated game. To illustrate the common principle behind these theorems, the complete proofs are given below for some of them.

## RESULTS AND DISCUSSION

An optimization model for eco-friendly flushing operations based on repeated games, generally consists of an objective function, constraints and an optimization technique. In this paper, the ecological

flow constraint and its improvement, compared to previous studies, are highlighted. The core functions of the reservoir – i.e., (a) minimization of irrigation deficits, (b) maximization of sediment discharged, (c) minimization of effluent volume, and, (d) maximization of power generated – can be used as the objective functions in the model. The assignment of priority weightings to individual objectives depends on the reservoir's operation policy. A multi-objective, optimal operation model of water-sedimentation in Dez Hydropower Reservoir was established to coordinate maximization of sediment evacuated with minimization of effluent volume, and improve the comprehensive benefits to the reservoir.

$$\text{opt } E = \left\{ \text{Max} \sum_{t=1}^T V_{(so)t}, \text{Min} \sum_{t=1}^T V_{(o)t} \right\} \quad (3)$$

where  $E$  is the comprehensive benefits;  $V_{(so)t}$  the sediment discharge volume during flushing over time interval  $t$ ;  $V_{(o)t}$  the effluent volume over time interval  $t$ ; and  $T$  the total number of time intervals. General descriptions on constraints can be found in Atkinson (1996) and Kawashima *et al.* (2003) for existing flushing criteria, and Khakzad & Elfimov (2015) for ecological flow constraints.

Criteria for determining whether flushing at a particular reservoir will be successful are required. There are two key requirements; first, the sediment quantities transported through the low level outlets during flushing must be sufficient to enable a long-term balance between the sediment inflow and the sediment flushed, and second, the volume of deposits remaining in the reservoir after sediment balance has been achieved is sufficiently small to enable a specified storage requirement to be met. These criteria depend on the hydraulic efficiency of flushing and by applying them, reservoirs where flushing might be viable can be identified. The hydraulic efficiency of flushing can be defined in several ways and some definitions are shown in Table 2 (Khakzad & Elfimov 2014b).

**Table 2** | Different definitions of flushing efficiency

| Efficiency expression                | Author                   |
|--------------------------------------|--------------------------|
| $E = V_o/V_d$                        | Qian (1982)              |
| $E = L_o/L_i$                        | Ackers & Thompson (1987) |
| $E = (V_2 - V_1)/V_o$                | Mahmood (1987)           |
| $E = (V_2 - V_1)/V_{ori}$            | Mahmood (1987)           |
| $E = T_r/(1 - T_f)$                  | Mahmood (1987)           |
| $E = L_o/L_d$                        | Atkinson (1996)          |
| $E = (V_{so} - V_{si})/V_o$          | Lai & Shen (1996)        |
| $E = (V_o C_o - V_i C_i)/(\rho V_o)$ | Morris & Fan (1997)      |

$C_i$ , total sediment concentration of inflow [ $\text{kg m}^{-3}$ ];  $V_d$ , volume of deposit flushed out [ $\text{m}^3$ ];  $C_o$ , total sediment concentration of outflow [ $\text{kg m}^{-3}$ ];  $V_i$ , inflow water volume [ $\text{m}^3$ ];  $E$ , flushing efficiency;  $V_o$ , outflow water volume [ $\text{m}^3$ ];  $L_d$ , annual quantity of sediment deposited [ $\text{kg}$ ];  $V_{ori}$ , original live capacity of reservoir [ $\text{m}^3$ ];  $L_i$ , annual quantity of sediment inflow [ $\text{kg}$ ];  $V_{so}$ , outflow sediment volume during flushing [ $\text{m}^3$ ];  $L_o$ , annual quantity of sediment flushed out [ $\text{kg}$ ];  $S_{si}$ , inflow sediment volume during flushing [ $\text{m}^3$ ];  $T_r$ , fraction of year used for flushing;  $V_1$ , storage capacity of reservoir before flushing [ $\text{m}^3$ ];  $T_f$ , fraction of year that the river's sediment load will take to refill  $V_2 - V_1$ ;  $V_2$ , storage capacity of reservoir after flushing [ $\text{m}^3$ ];  $\rho$ , bulk density of deposit [ $\text{kg m}^{-3}$ ].

This study concerns the sediment balance, and the ratio between the useful storage capacity that can be maintained in the reservoir and a substantial proportion of its original capacity, as criteria to predict the feasibility of flushing sediment out. For this purpose, the main criteria such as the sediment balance (SBR), long-term capacity (LTCR), drawdown (DDR), flushing width (FWR), reservoir top width (TWR), and capacity inflow ratios (C/I), and the sediment potential (SP) are used. These

criteria are defined by Atkinson (1996) and Kawashima *et al.* (2003) as:

$$\text{SBR} = \frac{\text{sediment mass flushed annually}}{\text{sediment mass deposited annually}} > 1 \quad (4)$$

$$\text{LTCR} = \frac{\text{sustainable capacity}}{\text{original capacity}} > 0.35 \quad (5)$$

$$\text{DDR} = 1 - \frac{\text{flow depth for the flushing water level}}{\text{flow depth for the normal impounding level}} > 0.7 \quad (6)$$

$$\text{FWR} = \frac{\text{predicted flushing width}}{\text{representative bottom width of reservoir}} > 1 \quad (7)$$

$$\text{TWR} = \frac{\text{top width of scoured valley}}{\text{actual top width}} \sim 1 \quad (8)$$

$$\text{SP} = \frac{\text{mean annual sediment inflow}}{\text{original storage capacity}} > 1 \quad (9)$$

Following previous research (Khakzad & Elfimov 2015), evaluating the effect of sediment on aquatic ecosystems using the decision tree forest (DTF) and group method of data handling (GMDH) for 198 aquatic ecosystem data, this study includes a proposal for the scale of severity (SEV) of ill effects on fish for the ecological flow constraints. This is more complicated than conventional reservoir operation that either does not consider ecological flow requirements or takes into account only a constant minimum flow. Equations (10)–(14) show SEV based respectively on the concentration of suspended sediment, species, life stage and duration of exposure.

$$\begin{aligned} \text{SEV(For adult salmonids and rainbow trout smelt)} &= \text{Log concentration (mg/L)} \times -0.8697 \\ &+ \text{Log concentration (mg/L)} \times \text{Log exposure duration (h)} \times 0.4377 \\ &+ \text{Log exposure duration (h)} \times 3.886 \end{aligned} \quad (10)$$

$$\text{MAE} = 0.3781 \quad \text{RMSE} = 0.4465 \quad R^2 = 0.9883$$

$$\begin{aligned} \text{SEV(For juvenile salmonids)} &= 15.28 + \text{Log concentration (mg/L)} \times -2.415 \\ &+ \text{Log concentration (mg/L)} \times \text{Log exposure duration (h)} \times 0.0543 \\ &+ \text{Log concentration}^2 \text{ (mg/L)} \times 0.2024 + \text{Log exposure duration (h)} \\ &\times -0.6366 + \text{Log exposure duration}^2 \text{ (h)} \times 0.0442 \end{aligned} \quad (11)$$

$$\text{MAE} = 0.7787 \quad \text{RMSE} = 0.9875 \quad R^2 = 0.8214$$

$$\begin{aligned} \text{SEV(For salmonid eggs and larvae)} &= 4.665 + \text{Log concentration (mg/L)} \times 0.7655 \\ &+ \text{Log exposure duration (h)} \times 0.7376 \end{aligned} \quad (12)$$

$$\text{MAE} = 0.4412 \quad \text{RMSE} = 0.5634 \quad R^2 = 0.9246$$

$$\begin{aligned} \text{SEV(For juvenile salmonids)} &= -12.81 + \text{Log concentration (mg/L)} \times 9.677 \\ &+ \text{Log concentration (mg/L)} \times \text{Log exposure duration (h)} \times 0.4975 + \text{Log concentration}^2 \text{ (mg/L)} \\ &\times -1.006 + \text{Log exposure duration (h)} \times -2.402 \end{aligned} \quad (13)$$

$$\text{MAE} = 0.6866 \quad \text{RMSE} = 0.7934 \quad R^2 = 0.9620$$

$$\begin{aligned} \text{SEV(For adult nonsalmonids)} &= 15.94 + \text{Log concentration}^{-1} \text{ (mg/L)} \times -108.1 \\ &+ \text{Log concentration (mg/L)} \times \text{Log exposure duration (h)} \times -0.0694 \\ &+ \text{Log concentration}^{-1} \text{ (mg/L)} \times \text{Log exposure duration (h)} \times 8.871 \\ &+ \text{Log concentration}^{-1} \text{ (mg/L)} \times \text{Log Exposure duration}^{-1} \text{ (h)} \times 195.7 \end{aligned} \quad (14)$$

$$\text{MAE} = 0.9787 \quad \text{RMSE} = 1.273 \quad R^2 = 0.6398$$

The Dez River provides fish habitat, and supports commercial (market), subsistence and recreational fisheries. A list of economically important fish species found along the river downstream of the dam is given in Table 3. The categories most representative of the river's fish community are adult freshwater non-salmonids, and the eggs and larvae of salmonids and adult non-salmonids. Local fishermen indicate that high suspended sediment loads during flood seasons reduce catches substantially, because fish abandon their usual locations and cannot be found. The likelihood of damaging nets is also higher during high turbidity events. This is consistent with the responses from fishermen the day after flushing, i.e., that the fish were not biting or that only small fish were being caught in the nets.

**Table 3** | Fish species downstream of Dez Hydropower Dam

| Scientific Name                  | English Name                    | Farsi Name                    |
|----------------------------------|---------------------------------|-------------------------------|
| <i>Aspius vorax</i>              | Mesopotamian asp                | Shelej                        |
| <i>Barbus esonicus</i>           | Tigris salmon                   | Ghonreh, Bej, Song            |
| <i>Barbus grypus</i>             | Large-scaled barb               | Shirbot, Shebbot, Sorkheh     |
| <i>Barbus luteus</i>             | Golden barb                     | Hamri, Zardak, Orange Zangool |
| <i>Barbus pectoralis</i>         | Levantine barbel                | Barzam, Nabash                |
| <i>Barbus sharpeyi</i>           | Binni                           | Benni                         |
| <i>Barbus subquincunciatus</i>   | Black spot barb                 | Soleimani, Barzam-e-Khaldar   |
| <i>Capoeta damansara</i>         | n/a                             | Toini, Gel Khorak             |
| <i>Capoeta trutta</i>            | Long-spine scraper              | Toini                         |
| <i>Carassius auratus</i>         | Goldfish                        | Kapourche, Mahie Dehghan      |
| <i>Chalacaburuns mossulensis</i> | n/a                             | Shah Kolie Jonoubi            |
| <i>Chondrostoma regium</i>       | Mesopotamian nase               | Nazok                         |
| <i>Cyprinion kais</i>            | Kais kingfish, smallmouth lotak | Botak-e-Dahan Koochak         |
| <i>Cyprinion macrostomum</i>     | Large-mouthed barb              | Botak-e-Dahan Bazorg          |
| <i>Silurus triostegus</i>        | Mesopotamian catfish            | Esbele, Yari                  |
| <i>Heteropneustes fossilis</i>   | Stinging catfish                | Shlambo, Doodeh               |
| <i>Liza abu</i>                  | Abu mullet                      | Biah, Zoory, Shouchi          |
| <i>Tenualosa ilisha</i>          | Ilisha, Hilsa shad              | Shobour, Zabour               |

Dez Hydropower Dam is provided with three low-level outlets within the dam body. Their original purpose was to provide irrigation releases downstream during periods of low flow through the turbines. They were also intended to provide a means of emergency release from the reservoir, if necessary. The historical outflows from the powerhouse, spillway facilities and low-level outlets are 200, 80 and 150 m<sup>3</sup>/s, respectively.

There are two ways to interpret the discount factor,  $d$ . The first can, for convenience, be called 'economic'. Economists have observed that individuals (or groups such as private companies) value their current or near-term well-being substantially more than that in the long-term; the power of the discount factor reflects this. Another interpretation, which is mathematically equivalent, can be called 'natural'. In this, the discount factor  $d \in [0, 1)$  is viewed as the probability that the repeated game will continue at the next iteration. This explanation is more convenient for artificial agents because it is generally questionable whether they value the future in a similar way to humans. The probability of continuation, in turn, seems to be more 'natural' because the machine always has a non-zero probability of fault. For very shortsighted players with a low discount factor  $d < \frac{1}{2}$  in this study, the (common) discount factor was set to  $d = 0.1$  for every transition and the maximum number of iterations at 200. These parameter settings are regarded as optimal for the standard

repeated games algorithms. Figures 7 and 8, and Table 4 present the results of optimization of eco-friendly flushing operations in Dez Hydropower Reservoir. They describe the payoffs – maximum sediment evacuation with minimum water outflow, acceptable average water volume per flush ( $\text{Mm}^3$ ) and acceptable average sediment volume per flush ( $\text{Mm}^3$ ) for the two scenarios.

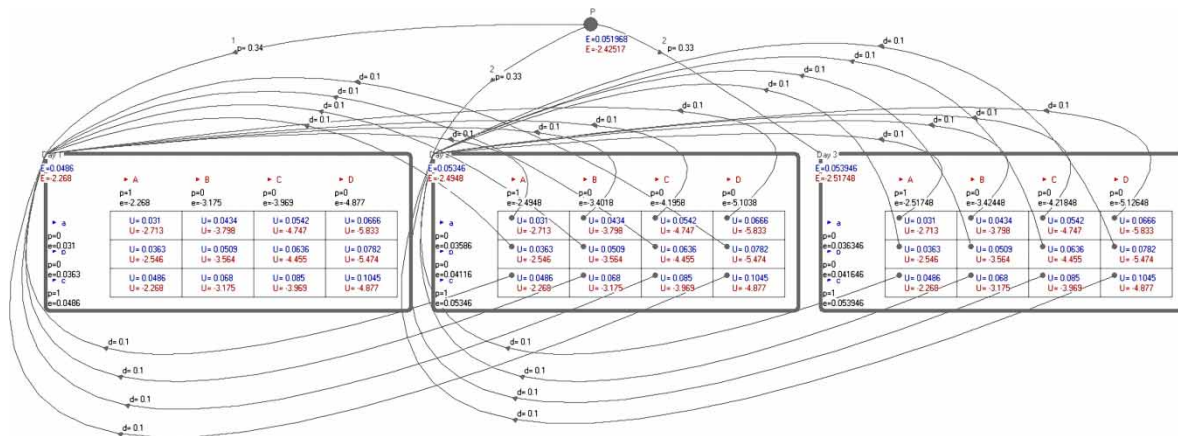

**Figure 7** | Results of repeated games for scenario 1 (for protecting eggs & early life stage salmonids). Red shows an acceptable average volume of water per flush ( $\text{Mm}^3$ ) and blue shows an acceptable average sediment volume ( $\text{Mm}^3$ ). In this figure, a, b and c are acceptable single flushes for exposure times = 3.77, 3.54 and 3.15 (hrs), with acceptable sediment concentration downstream of the spillway = 8,000, 10,000, 15,000 (mg/L). A, B, C and D are assumed average historic outflows = 200, 280, 350, 430 ( $\text{m}^3/\text{s}$ ), respectively.

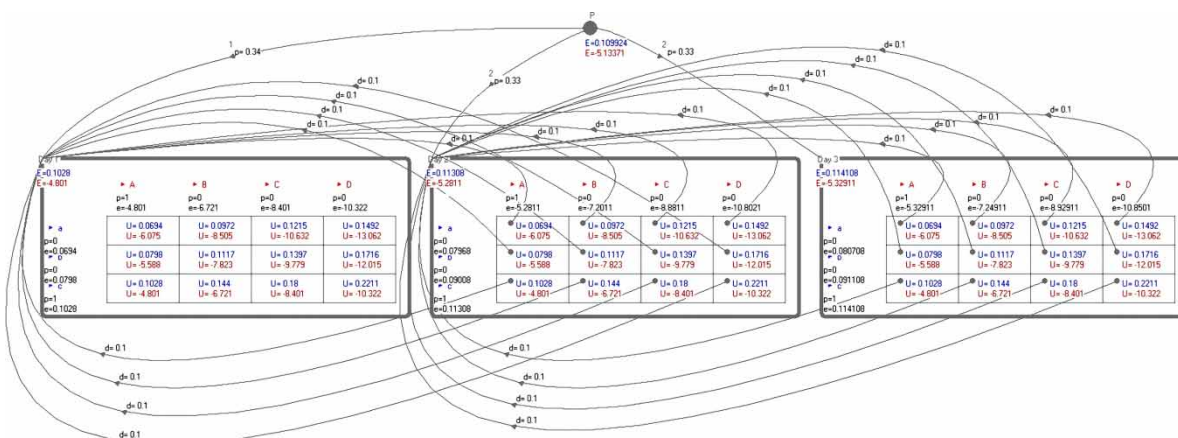

**Figure 8** | Results of repeated games for scenario 2 (protecting adult non-salmonids). Red shows an acceptable average volume of water per flush ( $\text{Mm}^3$ ) and blue shows an acceptable average sediment volume ( $\text{Mm}^3$ ). In this figure, a, b and c are acceptable single flushes for exposure times = 8.44, 7.76 and 6.67 (hrs), with acceptable sediment concentration downstream of the spillway = 8,000, 10,000, 15,000 (mg/L). A, B, C and D are assumed average historic outflows = 200, 280, 350, 430 ( $\text{m}^3/\text{s}$ ), respectively.

Three distinct kinds of information are displayed in the solution, in addition to the standard game display: Above each move is the probability that it is chosen in this equilibrium. Below each node is the expected payoff for each player when reaching that node. Above the probability of each move is the expected payoff for its owner of making that choice.

As most fish in the Dez River spawn in March or April, the most conservative of the eggs and larvae, or adult, graphs should be employed from March through June (scenario 1), and the adult graphs throughout the rest of the year (scenario 2). The results of the proposed flushing optimization

**Table 4** | Results of repeated games for scenarios 1 and 2

| Scenarios                                                 | Acceptable single flushing times (hrs) and outflows (m <sup>3</sup> /s) | Acceptable average water volume per flush (Mm <sup>3</sup> ) | Acceptable average sediment volume per flush (Mm <sup>3</sup> ) |
|-----------------------------------------------------------|-------------------------------------------------------------------------|--------------------------------------------------------------|-----------------------------------------------------------------|
| Scenario 1 (protecting eggs & early life stage salmonids) | T = 3.15, Q = 200                                                       | 2.43                                                         | 0.052                                                           |
| Scenario 2 (protecting adult non-salmonids)               | T = 6.67, Q = 200                                                       | 5.13                                                         | 0.110                                                           |

framework showed that this method provides a powerful tool for selecting the optimum response scenario against the identified risks, and can be an important instrument for change in the quality of sediment management.

## SUMMARY AND CONCLUSIONS

There is increasing attention to river ecosystem conservation in Iran due to massive dam construction and reservoir regulations. The need to release ecological flows downstream has gradually reached a consensus in reservoir operations. In this study, repeated games were used successfully to optimize flushing of Dez Hydropower Reservoir and evaluate the derived predictive model. The study was based on maximizing sediment evacuation with minimum water outflow, as objectives, and existing flushing criteria and ecological flow as constraints. All scenarios proposed in the study enhance sediment evacuation and thus the reservoir's sustainability. The results show that the repeated games algorithm can obtain high-quality solutions quickly for establishing an objective quantitative relationship between technical and executive requirements, and environmental impacts. Although the model was only applied to Dez Hydropower Reservoir in this study, its generic form enables it to be applied to a broad range of reservoirs to extend their useful lives.

## REFERENCES

- Ackers, P. & Thompson, G. 1987 Reservoir sedimentation and influence of flushing. In: *Sediment Transport in Gravel-bed Rivers* (Thorne, C. R., Bathurst, J. C. & Hey, R. D. eds). John Wiley & Sons, Chichester, pp. 845–868.
- Adhami, M. & Sadeghi, S. H. 2016 [Sub-watershed prioritization based on sediment yield using game theory](#). *Journal of Hydrology* **541**, 977–987.
- Atkinson, E. 1996 *The Feasibility of Flushing Sediment From Reservoirs*. HR Wallingford, UK, p. 21. Report no. OD 137.
- Burkov, A. & Chaib-draa, B. 2015 Computing equilibria in discounted dynamic games. *Applied Mathematics and Computation* **269**, 863–884.
- Cao, G. H., Jiang, D. L. & Tang, R. J. 2011 Dynamic optimal decision based on watershed ecocompensation. Application of differential game theory. *Systems Engineering* **11**, 011.
- Carraro, C., Marchiori, C. & Sgobbi, A. 2005 *Applications of Negotiation Theory to Water Issues*. World Bank Policy Research Working Paper No. 3641. World Bank, Washington, D.C.
- Dezab Consulting Engineers in association with ACTRES international 2004. *Dez Dam Rehabilitation Project Contract No. 81-5M334*. Iranian Minister of Energy, Tehran.
- Fruchart, F. 2008 Why and how to flush a reservoir without environmental impacts. In: *Regional Workshop on Discharge and Sediment Monitoring and Geomorphological Tools for the Lower-Mekong Basin Vientiane, Lao PDR*, 21–22 October 2008, pp. 33.
- Kawashima, S., Johndrow, T., Annandale, G. & Shah, F. 2003 *Reservoir Conservation Volume II: The RESCON Model & User Manual*. World Bank, Washington, D.C.
- Khakzad, H. & Elfimov, V. I. 2014a Evaluation of flow regime of turbidity currents entering Dez Reservoir using extended shallow water model. *Water Science & Technology* **7**(3), 267–276.
- Khakzad, H. & Elfimov, V. I. 2014b An Alternative Approach to Assessing Feasibility of Flushing Sediment from Reservoirs. In *Proceedings of Moscow State University of Civil Engineering*, № 6. C, pp. 126–136.
- Khakzad, H. & Elfimov, V. I. 2015 [Evaluation of effect of sediment on aquatic ecosystems using decision tree forest and group method of data handling](#). *Water Quality Research Journal of Canada* **50**(2), 123–139.

- Khuzestan Water and Electricity Organisation (KWEO) 2003 *Turbidity Current Measurement in Dez Dam Reservoir*. Iranian Minister of Energy, Tehran.
- Kucukmehmetoglu, M. 2012 [An integrative case study approach between game theory and Pareto frontier concepts for the transboundary water resources allocations](#). *Journal of Hydrology* **450**, 308–319. DOI:10.1016/j.jhydrol.2012.04.036.
- Lai, J. S. & Shen, H. W. 1996 [Flushing sediment through reservoirs](#). *Journal of Hydraulic Research* **34**(2), 237–255.
- Madani, K. 2010 [Game theory and water resources](#). *Journal of Hydrology* **381**, 225–238.
- Mahmood, K. 1987 *Reservoir Sedimentation: Impact, Extent, and Mitigation*. World Bank Technical Paper Number 71, Washington, D.C.
- Matsumoto, A. & Szidarovszky, F. 2016 *Game Theory and Its Applications*. Springer, Tokyo, Japan.
- McCartney, M. P., Sullivan, C. & Acreman, M. C. 2001 *Ecosystem Impacts of Large Dams*. Background Paper Nr. 2 Prepared for IUCN (International Union for Conservation of Nature and Natural Resources), Gland, Switzerland; UNEP (United Nations Environmental Programme), Nairobi, Kenya; and WCD (World Commission on Dam), p. 82.
- Morris, G. & Fan, J. 1997 *Reservoir Sedimentation Handbook; Design and Management of Dams, Reservoirs and Watersheds for Sustainable use*. McGraw Hill, New York.
- Nikolaos, P. E., Sebastian, P., George, W. A. & Pravin, K. 2017 *Reservoir Conservation Model Rescon 2 Beta*. International Bank for Reconstruction and Development/The World Bank.
- Parrachino, I., Dinar, A. & Patrone, F. 2006 *Cooperative Game Theory and its Application to Natural, Environmental, and Water Resource Issues: 3. Application to Water Resources*. World Bank Policy Research Working Paper No. 4074, WPS4072. World Bank, Washington, DC.
- Qian, N. 1982 Reservoir sedimentation and slope stability; technical and environmental effects. In *Fourteenth International Congress on Large Dams, Transactions*, Rio de Janeiro, Brazil, 3–7. ICOLD, Rio de Janeiro, Brazil, Vol. III, pp. 639–690.
- Shi, G. M., Wang, J. N., Zhang, B., Zhang, Z. & Zhang, Y. L. 2016 [Pollution control costs of a transboundary river basin: empirical tests of the fairness and stability of cost allocation mechanisms using game theory](#). *Journal of Environmental Management* **177**, 145–152. DOI:10.1016/j.jenvman.2016.04.015.
- Sloff, C. J. 1991 *Sedimentation in Reservoirs*. Ph.D. Thesis, Report no. 97-1, Communications on Hydraulic and Geotechnical Engineering, Delft University of Technology, Faculty of Civil Engineering, The Netherlands.
- Üçler, N., Engin, G. O., Köçken, H. G. & Öncel, M. S. 2015 [Game theory and fuzzy programming approaches for bi-objective optimization of reservoir watershed management: a case study in Namazgah reservoir](#). *Environmental Science and Pollution Research* **22**(9), 6546–6558. DOI:10.1007/s11356-015-4181-8.
- Wang, L. Z., Fang, L. & Hipel, K. W. 2003 [Water resources allocation: a cooperative game theoretic approach](#). *Journal of Environmental Informatics* **2**(2), 11–22.
- Zara, S., Dinar, A. & Patrone, F. 2006 *Cooperative Game Theory and its Application to Natural, Environmental, and Water Resource Issues: 2. Application to Natural and Environmental Resources*. World Bank Policy Research Working Paper 4073, WPS4072. World Bank, Washington, DC.
